1 **Factors influencing COVID-19 vaccination decision-making among African American and**  
2 **Hispanic pregnant and postpartum women in Deep South**

3 Ran Zhang<sup>1\*</sup>, Tiffany Byrd<sup>1</sup>, Shan Qiao<sup>1</sup>, Myriam E. Torres<sup>2</sup>, Xiaoming Li<sup>1</sup>, Jihong Liu<sup>2</sup>

4 <sup>1</sup> Department of Health Promotion, Education, and Behavior, Arnold School of Public Health, University  
5 of South Carolina, Columbia, South Carolina, United States of America

6 <sup>2</sup> Department of Epidemiology and Biostatistics, Arnold School of Public Health, University of South  
7 Carolina, Columbia, South Carolina, United States of America

8

9 \*Corresponding author:

10 Ran Zhang

11 Email: [rz1@email.sc.edu](mailto:rz1@email.sc.edu) (RZ)

12 **Abstract**

13 **Background** COVID-19 vaccination is vital for ending the pandemic but concerns about its safety among  
14 pregnant and postpartum women, especially among African American (AA) and Hispanic women, persist.  
15 This study aims to explore factors that influence vaccination decision-making among AA and Hispanic  
16 pregnant and postpartum women through women’s experiences and maternal care providers’ (MCPs)  
17 observations.

18 **Methods** From January and August 2022, we conducted semi-structured interviews with AA and  
19 Hispanic women and MCPs. Participants were recruited from obstetric and pediatric clinics in South  
20 Carolina, and all births took place after March 2020. Thematic analysis was employed for data analysis.

21 **Results** The study involved 19 AA and 20 Hispanic women, along with 9 MCPs, and revealed both  
22 barriers and facilitators to COVID-19 vaccination. The factors that influence pregnant and postpartum  
23 women’s decision about COVID-19 vaccine uptake included: 1) awareness of health threats associated  
24 with COVID-19 vaccines, 2) vaccine availability and accessibility, 3) vaccine-related knowledge and  
25 exposure to misinformation, 4) concerns regarding pre-existing health conditions and potential side  
26 effects of COVID-19 vaccines, 5) emotional factors associated with vaccination decision-making  
27 processes, 6) concerns about the well-being of infants, 7) cultural perspectives, and 8) encouragement by  
28 trusted supporters.

29 **Conclusion** Findings suggest that reliable information, social support, and trusted doctors’ advice can  
30 motivate COVID-19 vaccination. However, barriers such as misinformation, mistrust in the health care  
31 system, and fears related to potential side effects impede vaccination uptake among AA and Hispanic  
32 pregnant and postpartum women. Future interventions should target these barriers, along with health  
33 disparities, involve trusted doctors in outreach, and initiate vaccine conversations to promote vaccination  
34 among this population.

35

36 **Keywords:** COVID-19 vaccination, pregnant and postpartum women, vaccination decision-making,  
37 African American, Hispanic, COVID-19 pandemic

## 38 1. Introduction

39 The COVID-19 pandemic has caused a significant number of cases and deaths worldwide,  
40 making vaccination an important strategy to prevent severe adverse health outcomes. Although various  
41 health organizations, including the Centers for Disease Control and Prevention (CDC), the American  
42 College of Obstetricians and Gynecologists (ACOG), and the Society for Maternal-Fetal Medicine  
43 (SMFM), recommend COVID-19 vaccination for pregnant women, data indicate that vaccination  
44 coverage for pregnant women remains low compared to the general population (1, 2). Data from the  
45 National Immunization Survey (COVID-19 supplemental module) showed that among women aged 18-  
46 49 years, COVID-19 vaccination coverage was lower among pregnant women (45%) and breastfeeding  
47 women (51%) than non-pregnant women (65%) (3). This is concerning, as pregnant women have a higher  
48 risk of severe illness and mortality from COVID-19 and are at risk for adverse pregnancy outcomes, such  
49 as preterm delivery and stillbirth, compared with non-pregnant women (4, 5). These disparities highlight  
50 the need to investigate the factors influencing COVID-19 vaccination decision-making among pregnant  
51 women.

52 The decision-making process for COVID-19 vaccination is influenced by various factors,  
53 including limited available safety data on COVID-19 vaccine during pregnancy, lack of confidence in the  
54 safety and efficacy of the vaccine among health care providers and pregnant women, issues related to  
55 vaccine prioritization, access, and availability, as well as cultural and language barriers (3, 6, 7).  
56 Moreover, pregnant women are particularly concerned about the potential safety issues for their children  
57 associated with COVID-19 vaccination, which stems from the limited data on the effects of the vaccine  
58 on fetal development (8). These unresolved concerns about the safety and efficacy of the COVID-19  
59 vaccine can lead to hesitancy in their decision-making process. The research on COVID-19 vaccination  
60 during pregnancy has significantly expanded (9, 10). However, the presence of inconsistent information  
61 from social media and health authorities during the launch and promotion phases of the vaccine, coupled  
62 with conflicting advice from medical and public health professionals, has led to confusion and the  
63 perpetuation of misinformation (11, 12).

64 The impact of these factors is particularly pronounced among African American (AA) and  
65 Hispanic pregnant women, who face historical and contemporary racism and discrimination within the  
66 health care system (13, 14). Such experiences have led to mistrust and suspicion among these groups,  
67 creating barriers to seeking health care and following medical advice (15). In addition, AA and Hispanic  
68 people are more likely to experience socioeconomic and structural barriers to health care, such as  
69 inadequate access to health care facilities and insurance coverage (16). Thus, in such a sociocultural  
70 context, the decision to receive COVID-19 vaccines during pregnancy becomes even more complex AA  
71 and Hispanic pregnant women, necessitating a careful consideration of the potential costs and benefits.  
72 There is a dearth of empirical studies focusing on factors affecting COVID-19 vaccination decision-  
73 making among AA and Hispanic pregnant and postpartum women. This study aims to explore the factors  
74 that influence vaccination decision-making among AA and Hispanic pregnant and postpartum women  
75 through women's experiences and maternal care providers' (MCPs) observations. By uncovering these  
76 factors, the study seeks to inform targeted interventions that promote vaccination and help reduce health  
77 disparities within these underserved populations.

## 78 2. Methods

### 79 2.1 Study Design and Data Collection

80 Between January and August 2022, we conducted a qualitative study as part of a larger project  
81 that examined maternal care utilization and psychosocial well-being among AA and Hispanic pregnant  
82 and postpartum women during the COVID-19 pandemic. Purposive sampling was employed to recruit  
83 postpartum women and MCPs. Participants were recruited through local obstetrics and gynecology clinics  
84 and community health organizations that primarily served low-income AA and Hispanic women in South  
85 Carolina. The eligibility criteria included residency in South Carolina, age of at least 18 years, self-  
86 identification as AA or Hispanic, and all births occurring after March 2020. In total, we conducted 48  
87 interviews, including 19 AA women, 20 Hispanic women, and 9 MCPs. The semi-structured interviews  
88 were conducted via Zoom, by phone, or in-person by two researchers. We obtained informed consent  
89 from each participant, emphasizing their voluntary participation and right to withdraw at any time. Each

90 interview lasted approximately 50 minutes and was audio recorded with each participant's consent. Each  
91 participant received a \$50 gift card upon completion of the interview. The study received ethical approval  
92 from the University of South Carolina Institutional Review Board (Pro00115169).

## 93 2.2 Data Analysis

94 The interviews were transcribed verbatim, and for interviews conducted in Spanish, one of the  
95 researchers translated them into English for analysis. Anonymized transcriptions were then reviewed and  
96 subjected to inductive thematic analysis by two researchers (17). Each researcher individually assigned  
97 descriptive codes to the data, identifying frequently used phrases and examining the context in which they  
98 were used (17). Any coding discrepancies were resolved through discussion and by re-reviewing the  
99 transcripts. In the process of analyzing the interview transcripts, we found that a notable topic mentioned  
100 by the participants was COVID-19 vaccination decision-making, which encompassed awareness of health  
101 threats associated with COVID-19 vaccines, vaccine availability and accessibility, vaccine-related  
102 knowledge and misinformation, and concerns regarding the well-being of both women and their infants.

## 103 2.3 Demographic Characteristics

104 All the postpartum women participated in the study gave birth after March 2020 at a hospital in  
105 South Carolina. At the time of interview, AA women were between 21 to 42 years old, had at least a high  
106 school diploma or general education diploma, 74% were not first-time mothers, and had experience with  
107 maternal care services before and during COVID-19. In terms of insurance coverage, 58% of AA women  
108 had their births paid by Medicaid, 37% paid by private insurance, and 5% paid by themselves. AA women  
109 resided mainly in Richland (32%) and Spartanburg Counties (26%). Hispanic women were between 19 to  
110 41 years old, 50% did not have a high school diploma, all were immigrants to the US, and 75% were not  
111 first-time mothers. Regarding insurance coverage, 70% of Hispanic women had their births covered by  
112 Emergency Medicaid, 5% paid by Medicaid, 5% paid by a special program, and 20% paid by themselves.  
113 Hispanic women predominantly live in Richland (45%) and Lexington Counties (45%). The MCPs who  
114 were interviewed had a variety of occupations, including obstetric gynecologists, maternal fetal medicine  
115 specialists, nurses, and community doulas, consisting of eight females and one male. Five of the MCPs

116 worked in clinics that primarily served AA patients (50-80%), and three MCPs worked in clinics that  
117 served more evenly mixed patient populations (both AA and Hispanic patients comprised 20-40%) (Table  
118 1).

### 119 3. Results

120 Based on AA and Hispanic women's experiences and MCPs' observations, the current study  
121 revealed several factors that influenced the women's decision-making regarding COVID-19 vaccination  
122 with the following key themes emerged: 1) awareness of health threats associated with COVID-19, 2)  
123 vaccine availability and accessibility, 3) vaccine-related knowledge and exposure to misinformation, 4)  
124 concerns regarding pre-existing health conditions and potential side effects of COVID-19 vaccines, 5)  
125 emotional factors associated with vaccination decision-making processes, 6) concerns about the well-  
126 being of infants, 7) cultural perspectives, and 8) encouragement by trusted supporters.

#### 127 3.1 Awareness of health threats associated with COVID-19

128 Participants in both the AA and Hispanic groups expressed a strong awareness of the health  
129 threats posed by COVID-19 to themselves and others. They displayed stress and fear regarding their  
130 vulnerability to contracting the virus.

131 *"... during my pregnancy, the biggest concern for me, I was always nervous about catching*  
132 *COVID, because for some reason, last year, all you saw on the news was all these pregnant*  
133 *women going into a coma when they had COVID. So that stressed me out."* (AA 18)

134 *"... worried about getting sick, there were a lot of you heard on the news about people getting*  
135 *COVID and being pregnant and either the mom died or the baby died, or the mom had the baby*  
136 *but the mom still didn't make it. So it was very scary."* (AA 8)

137 *"Too scared about getting COVID and we didn't know how it was going to be. Fear of seeing*  
138 *other people but at the same time I didn't want to see anyone for that fear."* (Hispanic 19)

139 *"I was afraid to get sick especially at the beginning of the pandemic."* (Hispanic 5)

140 The news coverage of pregnant women experiencing severe outcomes from COVID-19  
141 contributed to their anxiety. Participants were particularly concerned about the potential risks to their own

142 health and the health of their infants. They expressed fear of getting sick and the possibility of adverse  
143 outcomes for both themselves and their babies. The participants also acknowledged the risk of COVID-19  
144 transmission within their households, especially to school-aged children. The optional mask-wearing  
145 policy in schools added to their worries.

146 *“Then my daughter's in school. So I worry about that, you know, they don't mandate masks*  
147 *wearing masks is optional in her school, she does wear masks, but it's just stressful because I*  
148 *don't want to get her sick, I don't want her to get sick. And I definitely don't want my little baby*  
149 *getting sick.”* (AA 1)

150 *“Yes, I was nervous about schools. Um just because, like I said, in m environment, I can control,*  
151 *but you started going to school, and then, wondering if my son had his mask on at the right times,*  
152 *did other people expose him to anything.”* (AA15)

153 *“Yes, because my daughter was in school and was worried that she would infect me with COVID.*  
154 *Also going to prenatal appointments and get infected there and not knowing what happened.”*  
155 (Hispanic 6)

156 Participants expressed concern about their ability to control the exposure of their children to the  
157 virus and the potential consequences of attending prenatal appointments. They highlighted their efforts to  
158 maintain a safe home environment and limit exposure to individuals entering and leaving their  
159 households. The anxiety and nervousness experienced by the participants led to heightened precautions  
160 such as frequent handwashing and avoidance of crowded places.

161 *“It was very nerve wrecking. Like, I was nervous about lifting up my shirt. Or as soon as I would*  
162 *come home from my doctor's appointment, I'm not even gonna lie to you, I jumped right into that*  
163 *shower. And I scrubbed from head to toe. And so it was just, I think I was more paranoid more*  
164 *over OCD [obsessive-compulsive disorder] as well. With this pandemic, especially being*  
165 *pregnant and even now, when I go out, when I come back, I wash 'cause I don't want to get sick.”*  
166 (AA 13)

167 *“Yes, I am very anxious and nervous about her being exposed. She's not in daycare 'cause of that*  
168 *reason. Actually, my mother and my husband's mother is the only people that watch her while*  
169 *we're at work. So we try to limit her exposure.” (AA 6)*

170 *“With the pandemic going on, I was like real skeptical about going anywhere. 'cause I didn't*  
171 *want catch COVID with me being pregnant. So I was really anxious due to the fact you know, I*  
172 *got help from my family. But for the most part, I had to do mostly everything myself. So it was*  
173 *like, do I want to leave the house? Do I have to leave the house? I was really nervous because of*  
174 *COVID.” (AA 12)*

175 *“Yes, I was scared to go to the store because I was pregnant.” (Hispanic 18)*

176 *“I was scared of everyone who got close to the baby because his defenses are low.” (Hispanic 16)*

### 177 3.2 Vaccine availability and accessibility

178 Both MCPs and women expressed their observations and experiences regarding the waiting  
179 period for vaccine development and distribution. Their responses reflect a sense of anticipation and the  
180 understanding that the availability of vaccines was crucial for providing adequate care and managing the  
181 pandemic. Their responses suggest a mixed sentiment, with some expressing anxiety and depression  
182 related to the vaccine's availability, while others acknowledge the challenges faced in obtaining necessary  
183 supplies and appointments due to the impact of COVID-19.

184 *“... early on, when the vaccines weren't available everybody wanted the vaccine now, then, when*  
185 *the vaccines became available, more people didn't want the vaccine. It was a two-edged sword,*  
186 *but it was another source of anxiety and depression.” (MCP 7)*

187 *“But it was kind of like, we were just sort of waiting on a vaccine, to be able to provide the same*  
188 *level of care. And we talked about this in the clinic, too, it's like, doctors are supposed to see sick*  
189 *patients, it was just that everybody was so scared, 'cause we hadn't seen something like this*  
190 *before. And young people were dying.” (MCP 8)*

191 *“So yeah, I feel like COVID pushed, help pushed a lot of stuff back. And then they weren't able to*  
192 *get some of the supplies they needed because of COVID and everything was back ordered. 'Cause*



193 *I know that happened to me a few times. With the vaccines, I couldn't get my shots on certain*  
194 *days. Because everything was backed up due to COVID.” (AA 3)*

195 MCPs also acknowledged the difficulties patients faced in accessing the COVID-19 vaccine at  
196 the point of service. They expressed a sense of frustration regarding the limited on-site accessibility of  
197 vaccines, which potentially hindered their ability to provide comprehensive care.

198 *“The vaccines are not accessible on site.” (MCP 4)*

199 *“They stopped doing the vaccines in our building, 'cause the demand was not as high ... now*  
200 *more people were getting sick and then the surge for vaccines increased. But I mean, we were*  
201 *sending our OB [obstetrics] patients... to go to a different building.” (MCP 4)*

### 202 3.3 Vaccine-related knowledge and exposure to misinformation

203 Some participants were hesitant to get vaccinated because of misinformation they heard or read.  
204 While this was a persistent challenge for MCPs trying to educate patients about the benefits and safety of  
205 vaccination, misinformation still led some patients to choose not to vaccinate themselves or their children.

206 *“... trying to educate them in terms of the vaccines, I mean, that's just been a constant battle. You*  
207 *know, trying to help them understand that it's safe, and it will protect you and the baby. But all the*  
208 *other misinformation that's out there, and that's definitely been a challenge and a battle, I will say, a*  
209 *lot more of our patients have gotten vaccinated than I really expected to see.” (MCP 2)*

210 *“... when new things come, ... when the vaccine did come out, then a lot of people did a lot of*  
211 *reading, my husband is like 'let me find out about this first'. And I am too ... I definitely wanted to*  
212 *know ... first if anybody else any other pregnant person had taken the vaccine, and you read a couple*  
213 *things that are good. And then you come across that one thing. Mom doesn't make it baby dies from*  
214 *vaccine and we were like, absolutely not.” (AA 8)*

215 Skepticism played a significant role in the decision-making process of participants who chose not  
216 to vaccinate themselves. Both AA participants and MCPs highlighted skepticism towards the vaccine, the  
217 rapid development process, and concerns about government involvement.

218 *“I've never been the type to take the vaccines anyway. But like looking into it, they just made that*  
219 *too fast I feel like, so I'm not saying I'm not, but I'm not doing that now. Like, I'll just watch how*  
220 *everybody else ... I'll just keep taking my vitamins, be cleaning and all that stuff, staying out the*  
221 *way.” (AA 7)*

222 *“It actually did, because it was such the unknown and at the point of my pregnancy, it was just*  
223 *approved for pregnant women. ... Is it safe for me to get it? Is it not okay? And I think I was*  
224 *about seven months pregnant, so I was so far long that I had no complications. Do I want to risk*  
225 *taking the vaccine and create a complication and I've been okay this whole time? So a lot of*  
226 *stress with that. Just going back and forth with the doctor's asking questions on how it would*  
227 *affect the baby. How would it affect me in my pregnancy? Just a lot of going back and forth a lot*  
228 *of stress and anxiety about just that alone.” (AA 5)*

229 *“... as the pandemic progressed, there was a lot of skepticism, lots and lots of skepticism about*  
230 *things like vaccine development and getting a vaccine. And I think that was just because of*  
231 *differences in education or possibly community dynamics that I'm not privy to, but definitely those*  
232 *affected my ability to provide inpatient care.” (MCP 6)*

233 *“I actually had a patient who happened to be African American who was actually in medicine,*  
234 *who was pregnant, and she was just like, don't talk to me about it again. I feel like I'm being*  
235 *profiled and I'm not getting the vaccine. I'm not gonna do it. She's like, nobody knows enough*  
236 *about this, everybody thinks they do, but I feel like, she's like, I feel like I'm being racially*  
237 *profiled, because you're pointing it out. I'm like, actually, well, I'm asking everybody about their*  
238 *vaccination status, but that, the tenor of it was not something that that had ever been really*  
239 *directed at me by a patient like that I would be racially profiling them for not. So.... Yeah.” (MCP*  
240 *5)*

241 Additionally, discussions and policies related to the pandemic, such as mask-wearing and  
242 telehealth, generated frustrations among patients, leading to their refusal to engage with MCPs regarding  
243 vaccination. MCPs reported that some patients expressed anger and indifference towards COVID-19

244 vaccination, stating that they did not want to hear about it or be pressured to receive it. One MCP  
245 recounted patients being frustrated or bemused by the various policies implemented, while another shared  
246 an experience with a pregnant AA patient who felt racially profiled and refused vaccination.

247 *“... for my other patients, um where I tended to see it was, they were either frustrated or bemused*  
248 *either by all of these policies and things that were being put into place like masking and*  
249 *telehealth and waiting in your car after you check in that sort of thing. Or they were angry, that*  
250 *we kept talking about things like vaccine in particular is a big example. I got lots of people who*  
251 *were like, stop talking to me about this. ‘I don't care about this.’ ‘I don't want to hear about it.’ ‘I*  
252 *don't care’.” (MCP 6)*

253 *“And then, you know, I had, I actually had a patient who happened to be African American who*  
254 *was actually in medicine, who was pregnant, and she was just like, don't talk to me about it*  
255 *again. I feel like I'm being profiled and I'm not getting the vaccine. I'm not gonna do it. She's like,*  
256 *nobody knows enough about this, everybody thinks they do, but I feel like, she's like, I feel like I'm*  
257 *being racially profiled, because you're pointing it out. I'm like, actually, well I'm asking*  
258 *everybody about their vaccination status, you know, but that, the tenor of it was not something*  
259 *that that had ever been really directed at me by a patient like that I would be racially profiling*  
260 *them for not. So....Yeah.” (MCP 5)*

261 3.4 Concerns regarding pre-existing health conditions and potential side effects of the vaccines

262 Some AA women expressed concerns regarding pre-existing health conditions and potential side  
263 effects of the COVID-19 vaccines, which contributed to their hesitancy and stress when deciding whether  
264 to get vaccinated. These pregnant women expressed a desire to mitigate any potential risks that the  
265 vaccine might pose to their body and pregnancy. One woman highlighted the stress of considering  
266 vaccination after having already contracted COVID-19 multiple times. Another woman mentioned a  
267 history of Guillain-Barré syndrome, which raised concerns about the potential adverse effects of  
268 vaccination. In addition, a woman shared worries about her past experiences with vaccines, experiencing  
269 severe illness after receiving the flu shot, and having asthma.

270 *“It was stressful just trying to think about whether or not I wanted to do that [get vaccinated], did I*  
271 *want to go through that [vaccination]? Because I did have it [COVID] already, twice.” (AA 1)*  
272 *“I can't have any vaccines. I have a history of the Guillain-Barré syndrome... But because I haven't*  
273 *had a vaccine since I was an elementary school and I didn't know if I took that right then and there if*  
274 *it would land me in the hospital. I said I just couldn't do it. I couldn't take that risk.” (AA 13)*  
275 *“Because I don't do well with vaccines at all. So I was worried about how the COVID vaccine would*  
276 *do me with being pregnant. Because with the flu shot, I get sick as a dog. So I could just imagine how*  
277 *the covid shot would do me. So I opted out to the wait until after she's born and all around, I don't go*  
278 *nowhere due to COVID because I don't want to catch COVID I don't want to give COVID to her. And*  
279 *then I have asthma.” (AA 3)*

### 280 3.5 Emotional factors associated with vaccination decision-making processes

281 AA women expressed fear or concerns regarding the COVID-19 vaccine, and MCPs echoed these  
282 sentiments in their recollection of patient observations. The main fears and concerns came from worries  
283 about potential side effects, introducing something new to the body, and the long-term effects on  
284 themselves and their infants. The decision to weigh the risk of contracting COVID-19 against the vaccine  
285 proved to be challenging for many women.

286 *“My husband recently got his first dose maybe three or four weeks ago, and he felt bad. I just don't*  
287 *want to feel that. So I'm kind of nervous about the side effects, honestly. I am going to get my vaccine*  
288 *shot, but I'm just kind of mentally preparing to do that because I don't know what could happen.”*  
289 (AA 1)

290 *“It can be really scary just to introduce anything new to your body, and making that decision to be*  
291 *vaccinated, I think was a really big one for a lot of moms. ... But I think that was difficult, I think,*  
292 *weighing the risk of getting COVID versus getting the vaccine and having to decide just weigh that*  
293 *risk.” (MCP 9)*

294 *“I get a lot of patients who are nervous about the covid vaccine in pregnancy, even though we try to*  
295 *provide them with as much data as we can. Because it's a relatively new vaccine. And because we*

296 *know the health care benefits to moms who don't get sick with COVID. Patients are still really scared*  
297 *about taking a vaccine that has not been studied for years and years. And they're worried about the*  
298 *long-term effects on the baby, long term effects on them, if they go ahead and get this vaccine. But to*  
299 *me, it's like, well, I don't understand that in respect to why do you want to get the illness instead? And*  
300 *then they're like, well, that's more natural.” (MCP 1)*

301 Some AA women expressed ambivalence about vaccination, neither strongly for nor against it,  
302 with concerns or uncertainties about vaccines. They described a sense of wariness and a lack of  
303 anxiousness or opposition toward getting vaccinated.

304 *“I don't want to say anxiety or concern. I think that I take a stand of being weary of it, but not*  
305 *against it. I thought maybe there was a possibility that they would say, before we left the hospital,*  
306 *we're gonna vaccinate her. I didn't know how that was gonna go. Or if they were going to require*  
307 *it going into the hospital, I wouldn't have been against it. Either way, just because I wasn't that*  
308 *person that was against the vaccine. But it didn't add any extra anxiousness or anything like*  
309 *that.” (AA 10)*

310 *“I was trying to figure out, did I need to get it? Or should I get it? But I didn't get it.” (AA 17)*

311 For some other AA women, the decision to receive the COVID-19 vaccine was less about choice  
312 and more about mandates imposed by their medical or work situations. Although they may have initially  
313 felt skeptical or hesitant, the requirement compelled them to proceed with vaccination. A few participants  
314 expressed their internal conflict.

315 *“Honestly, it bothered me a lot. Because when they first started, doing the vaccines, everybody*  
316 *had all these negative things to say about it, and how they felt like, it wouldn't work. ... It's like I*  
317 *always been kinda skeptical. I was like, Lord, if I don't have to get it, then I'm fine. But because I*  
318 *was in hospital, I think two and a half weeks before I had him. I had no choice but to get it.” (AA*  
319 *12)*

320 *“I already had in my mind that I really didn't want to get the vaccine. But because it was just kind*  
321 *of like so many different emotions and feelings about the vaccine itself, drew me to my decision.*  
322 *... and my employer required us so that that's the only reason why I did it.” (AA 14)*

### 323 3.6 Concerns about the well-being of their infants

324 Some participants expressed the motivation to vaccinate their children, primarily driven by  
325 concerns for their safety and well-being. One woman highlighted the importance of vaccination due to her  
326 child attending school, where mask policies were not strictly enforced. One AA woman mentioned  
327 vaccinating their children while acknowledging their own decision not to receive vaccines. Their  
328 motivation stemmed from wanting to prioritize their children's safety and take proactive measures to keep  
329 them protected.

330 *“The older child was vaccinated, but there was some concern because he went to school, and*  
331 *they weren't as strict with the mask policy.” (AA 18)*

332 *“I let my kids get shot because they were going to school but I never got shot ... so I wanted to be*  
333 *on the safe side when it comes to them.” (AA 17)*

334 Some women expressed a lack of trust in the government and doubted the thoroughness of the  
335 research conducted for vaccines. They raised concerns about vaccines' effectiveness and safety, despite  
336 acknowledging the risks associated with contracting COVID-19. This skepticism led them to weigh the  
337 pros and cons, ultimately deciding against vaccinating their children.

338 *“Because I really don't trust. And I know I sound crazy. I don't trust the government ... [I know] I*  
339 *had a baby on Medicaid, but I don't trust the government for that vaccine, I don't feel like there*  
340 *was too much research done. It was, you know, they came up with it so fast. So I didn't know I*  
341 *didn't trust the um effectiveness of it. And the safety-ness of it, even though I mean, catching*  
342 *COVID, vaccine. So I kind of weighed out the pros and cons as far as my current health status,*  
343 *and the likelihood of me um of COVID being fatal if I did catch it. So I kind of just um did not get*  
344 *the vaccine for me or my children.” (AA 11)*

### 345 3.7 Cultural perspectives

346 Several participants stated religious beliefs or a lack of belief in the use of vaccines. MCPs  
347 mentioned encountering postpartum patients who firmly stated that they did not believe in vaccination,  
348 attributing it to their religious beliefs. They expressed a reluctance to participate in what they perceived as  
349 an experimental practice. One MCP highlighted that although there was no official backing from religious  
350 authorities such as the Pope or prominent Islamic scholars, women held strong convictions that prevented  
351 them from considering new information and changing their stance on vaccination.

352 *“I remember rounding on them [COVID-19 vaccines] and going down to postpartum. And the*  
353 *vaccines weren't new, they've been out for a bit, but trying to say to my postpartum, ‘while you're*  
354 *here, can I vaccinate you for COVID?’ And being told again, and again. No, I don't do that.*  
355 *That's not something I do. That's not something I believe in. I don't want to be an experiment.”*  
356 (MCP 6)

357 *“Because people bring up like religious beliefs or something but that's really not backed up in*  
358 *any by any sort of person that's high up and like, it's not backed up by the Pope. It's not backed*  
359 *up by any other, religious scholar in the Islamic world. But people have their convictions that*  
360 *they're not really willing to forego when they see new information.”* (MCP 8)

### 361 3.8 Encouragement by trusted supporters

362 Trusted supporters, including health care providers and family members, played a crucial  
363 role in encouraging women to receive vaccines. Their influence was significant in shaping the  
364 decision-making process, as participants relied on their advice and expertise. Participants  
365 recounted instances where their mothers or health care providers positively influenced their  
366 decision to get vaccinated.

367 *“... my mom, she's a CNA nurse, and she works in a lot of the elderly departments ... and so she*  
368 *was already on top of it, getting all the information and she was like, ‘Look, go talk to your*  
369 *doctor. I don't know if it's okay for you to do it. But I would rather you and baby be okay’.*  
370 *Because of all of this, I went and talked to the doctor and they were like, ‘Yes, it's okay. The*  
371 *antibodies will transfer to baby’. And I was like, okay, sign me up.”* (AA 19)

372           *“Again, my first appointment, my first postpartum appointment back. And she was just like,*  
373           *‘[participant's name], things are getting real. And so I know you were on the fence about getting*  
374           *this vaccine. But if you get this vaccine while you're breastfeeding, the baby'll get antibodies too.*  
375           *So you know, I wouldn't tell you anything that I'm not telling anybody else. I wouldn't tell you to*  
376           *get it’. And I haven't gotten it [COVID]. And so she was like, ‘I really think you should get it*  
377           *because things are getting crazy’. And so I went ahead and got it [vaccination].” (AA 8)*

#### 378 4. Discussion

379           This study explored the factors that influence decision-making regarding COVID-19 vaccination  
380 among AA and Hispanic pregnant and postpartum women. Barriers influencing vaccination decision-  
381 making included awareness of health threats associated with COVID-19 vaccines, vaccine availability  
382 and accessibility, vaccine-related knowledge and exposure to misinformation, concerns about pre-existing  
383 health conditions and potential side effects of the vaccines, emotional factors associated with vaccination  
384 decision-making processes, concerns about the well-being of infants, and different cultural perspectives.  
385 Encouragement from trusted supporters acted as a facilitator for women’s vaccination decision-making.

386           Participants expressed awareness of the health threats associated with COVID-19 vaccines and  
387 concerns about the risks to themselves and their infants. This finding complements previous research  
388 highlighting the heightened awareness and concerns about the health threat posed by infectious diseases  
389 during pregnancy, such as the influenza virus (18). In addition, the availability and accessibility of  
390 COVID-19 vaccines emerged as crucial factor in women’s vaccination decision-making process. This  
391 finding reflects the early stages of the pandemic when vaccine availability was limited, and there was  
392 high demand for vaccines (19). Similar challenges were observed during the initial distribution of the  
393 influenza vaccine in the H1N1 pandemic, where demand initially exceeded supply (20). The accessibility  
394 of COVID-19 vaccines was influenced by multiple factors, including difficulties in accessing vaccination  
395 sites or lack of convenient options, particularly among underserved populations (21). Moreover,  
396 participants expressed a mix of anticipation, anxiety, and frustration related to the availability of vaccines  
397 and the challenges encountered in obtaining necessary supplies and appointments. Enhancing accessibility



398 through initiatives such as mobile vaccination clinics, community outreach programs, and targeted  
399 scheduling systems can help alleviate the challenges expressed by participants and contribute to increased  
400 vaccination.

401 Misinformation and skepticism surrounding COVID-19 vaccines pose significant barriers to  
402 pregnant women's vaccination decision-making, underscoring the importance of addressing vaccine-  
403 related knowledge gaps and countering exposure to misinformation. Social media platforms have been  
404 identified as sources of exposure to misinformation, conspiracy theories, and conflicting information  
405 about vaccines (11). The ease of sharing and accessing information on social media can lead to the rapid  
406 dissemination of misleading content, undermining public trust, and contributing to vaccine hesitancy.  
407 Participants also raised concerns about potential side effects and the desire to observe long-term safety  
408 data. These concerns are not unique to the COVID-19 vaccine and have been observed on various  
409 vaccines (22). Addressing misinformation and leveraging social media platforms as channels for accurate  
410 and evidence-based vaccine information can be a promising approach to promote vaccination. Providing  
411 accurate information about vaccine safety, addressing misconceptions about side effects, and alleviating  
412 concerns about long-term safety are crucial for increasing vaccine acceptance among pregnant women.

413 Emotional factors, such as fear of side effects and apprehension about introducing something new  
414 to their bodies, contribute to the vaccination decision-making process among pregnant women. The  
415 unique physical and emotional demands of pregnancy and the postpartum period intensify these factors  
416 (23-26). The decision-making process during pregnancy and postpartum period is accompanied by  
417 heightened responsibilities, as women consider the potential impacts on both their own health and the  
418 well-being of their babies. The weight of these responsibilities may exacerbate the emotional concerns  
419 and anxiety associated with vaccination decision-making, as women strive to make choices that prioritize  
420 the safety and health of both themselves and their babies.

421 Cultural perspectives emerged as significant factors affecting the COVID-19 vaccination  
422 decision-making process among AA and Hispanic women. Previous studies have highlighted the  
423 importance of implementing culturally tailored communication strategies and multilingual resources to

424 improve vaccine acceptance in diverse populations (27). It is worth noting that all Hispanic participants in  
425 our study were immigrants, and 70% relied on emergency Medicaid to cover childbirth expenses. These  
426 findings highlight the need to address the specific challenges faced by immigrant populations and the  
427 importance of providing appropriate support in accessing health care services during the pandemic.  
428 Moreover, the level of trust in the health care system and government emerged as a crucial determinant of  
429 vaccine acceptance. Building trust through transparent communication, community engagement, and  
430 addressing historical concerns is vital for improving vaccine confidence among AA and Hispanic women.  
431 Trusted supporters, such as health care providers and family members, play a crucial role in encouraging  
432 pregnant and postpartum women to get vaccinated against COVID-19. Trusted supporters can provide  
433 essential information, address concerns, and offer emotional support, thereby influencing decision-  
434 making processes.

435         MCPs, in particular, hold a position of trust and authority in maternal health care, making them  
436 key influencers in promoting vaccination among pregnant and postpartum women. Engaging in a  
437 conversation with MCPs may assist in decisions regarding COVID-19 vaccination during pregnancy.  
438 Conversations about risk should take into account the individual patient's values and perceived risk of  
439 various outcomes (28). Empowering MCPs through education on the importance of COVID-19  
440 vaccination and providing them with accurate information can enable them to effectively communicate  
441 the benefits and safety of vaccines to their patients. Moreover, involving family members and community  
442 leaders in health communication campaigns can leverage their influence to promote vaccination and  
443 address any misconceptions or fears (11). By harnessing the power of trusted supporters, health care  
444 systems can enhance vaccine acceptance among AA and Hispanic pregnant and postpartum women,  
445 ultimately contributing to better health outcomes for both mothers and their babies.

446         There are several limitations to this study. First, this study was based on a broader project. The  
447 interview guide used for the broader project did not focus on specific vaccination-related topics, which  
448 may have influenced the depth of participants' responses. Second, the Hispanic participants in this study  
449 were all immigrants, which may limit the generalization of the finds to Hispanic mothers with different

450 background. Third, we did not recruit white women in this study; thus, we cannot direct compare the  
451 experiences of different racial and ethnic groups in vaccination decision-making. Future studies should  
452 consider diverse samples to further explore these factors and develop targeted interventions to improve  
453 vaccine acceptance in these populations.

## 454 5. Conclusion

455 COVID-19 vaccination reduces the risk of severe illness and death from COVID-19, but AA and  
456 Hispanic pregnant and postpartum women face unique challenges that affect their vaccination decision-  
457 making. Women's lived experiences and MCPs' observations reveal barriers such as fear of potential  
458 vaccine side effects, misinformation, and distrust of the health care system prevented these women from  
459 vaccination. Conversely, reliable information, social support, and trusted doctors' advice can be  
460 facilitators for promoting COVID-19 vaccination. Future interventions should prioritize addressing health  
461 care disparities among pregnant women of color by actively involving trusted doctors in their  
462 communities, disseminating accurate information, and initiating tailored vaccination conversations during  
463 pregnancy and postpartum care. Moreover, providing insurance support for Hispanic women with  
464 immigrant backgrounds can address the challenges they faced during the pandemic. By recognizing and  
465 addressing these challenges, public health professionals can develop targeted communication strategies  
466 and interventions to improve vaccine acceptance and contribute to better health outcomes for AA and  
467 Hispanic pregnant and postpartum women.

468

Table 1. Sociodemographic characteristics of the participants.

| <i>Characteristic</i>                                      | <i>African American Participant (%)<br/>N=19</i> | <i>Hispanic Participant (%)<br/>N=20</i> |
|------------------------------------------------------------|--------------------------------------------------|------------------------------------------|
| <b>Age Range</b>                                           |                                                  |                                          |
| 18-25                                                      | 3 (16%)                                          | 5 (25%)                                  |
| 26-35                                                      | 12 (63%)                                         | 8 (40%)                                  |
| 36-50                                                      | 4 (21%)                                          | 7 (35%)                                  |
| <b>Education</b>                                           |                                                  |                                          |
| Less than high school diploma                              |                                                  | 10 (50%)                                 |
| High school diploma or general education development (GED) | 9 (47%)                                          | 6 (30%)                                  |
| Associate degree                                           | 1 (5%)                                           |                                          |
| Bachelor degree                                            | 5 (26%)                                          | 3 (15%)                                  |
| Master degree                                              | 4 (21%)                                          |                                          |
| No education                                               |                                                  | 1 (5%)                                   |
| <b>Marital Status</b>                                      |                                                  |                                          |
| Single                                                     | 2 (11%)                                          | 6 (30%)                                  |
| Married                                                    | 9 (47%)                                          | 6 (30%)                                  |
| Living with unmarried partner                              | 8 (42%)                                          | 8 (40%)                                  |
| <b>Number of Children</b>                                  |                                                  |                                          |
| 1                                                          | 5 (26%)                                          | 5 (25%)                                  |
| 2                                                          | 8 (42%)                                          | 3 (15%)                                  |
| 3                                                          | 4 (21%)                                          | 6 (30%)                                  |
| 4                                                          | 2 (11%)                                          | 3 (15%)                                  |
| >4                                                         |                                                  | 3 (15%)                                  |
| <b>Insurance Coverage</b>                                  |                                                  |                                          |
| Medicaid                                                   | 11 (58%)                                         | 1 (5%)                                   |
| Private insurance                                          | 7 (37%)                                          |                                          |
| Self-pay                                                   | 1 (5%)                                           | 4 (20%)                                  |
| Emergency Medicaid                                         |                                                  | 14 (70%)                                 |
| Other/program                                              |                                                  | 1 (5%)                                   |
| <b>Place of Birth</b>                                      |                                                  |                                          |
| USA                                                        | 19 (100%)                                        |                                          |
| Colombia                                                   |                                                  | 4 (20%)                                  |
| Mexico                                                     |                                                  | 4 (20%)                                  |
| Guatemala                                                  |                                                  | 6 (30%)                                  |
| Honduras                                                   |                                                  | 4 (20%)                                  |
| Costa Rica                                                 |                                                  | 1 (5%)                                   |
| Unknown                                                    |                                                  | 1 (5%)                                   |
| <b>County of Residence</b>                                 |                                                  |                                          |
| Darlington                                                 | 1 (5%)                                           |                                          |

|             |         |         |
|-------------|---------|---------|
| Spartanburg | 5 (26%) |         |
| Colleton    | 3 (16%) |         |
| Beaufort    | 1 (5%)  |         |
| Richland    | 6 (32%) | 9 (45%) |
| Sumter      | 2 (11%) |         |
| Lexington   | 1 (5%)  | 9 (45%) |
| Berkeley    |         | 1 (5%)  |
| Unknown     |         | 1 (5%)  |

| <i>Characteristic</i>                                                       | <i>Maternal Care<br/>Provider<br/>N=9</i> |
|-----------------------------------------------------------------------------|-------------------------------------------|
| <b>Age</b>                                                                  |                                           |
| 26-35                                                                       | 1                                         |
| 36-45                                                                       | 3                                         |
| 46-55                                                                       | 3                                         |
| 56-65                                                                       | 2                                         |
| <b>Tenure at Current Practice/Hospital</b>                                  |                                           |
| <1 year                                                                     | 2                                         |
| 1-5 years                                                                   | 4                                         |
| 6-10 years                                                                  | 3                                         |
| <b>Job Title/Specialty Area</b>                                             |                                           |
| Certified Midwife                                                           | 2                                         |
| Obstetrics and<br>Gynecology/Resident/Maternal<br>Fetal Medicine Specialist | 4                                         |
| Registered Nurse/Nurse<br>Practitioner                                      | 3                                         |

Note: Percentages do not add up to 100% due to rounding.

470 **Author Contributions:** JL and SQ conceptualized and designed the study. RZ and TB wrote the first  
471 draft and SQ, JL, MET, and XL participated in writing sections of the original proposal. All authors  
472 critically reviewed and edited the manuscript. JL, MET, TB, and RZ participated in data collection, data  
473 analysis, and data interpretation. JL and XL secured the funding.

474 **Funding:** This research was supported by the National Institute of Allergy and Infectious Diseases and  
475 Office of the Director of the National Institutes of Health under Award Number R01AI127203-5S2 for  
476 Implementing a Maternal health and PRenancy Outcomes Vision for Everyone (IMPROVE). XL and JL  
477 are the MPIs for this study.

478 **Institutional Review Board Statement:** The study was approved by the Institutional Review Board of  
479 the University of South Carolina (Pro00115169).

480 **Acknowledgements:** We express our gratitude to the participants for their willingness to share their lived  
481 experiences and for dedicating their time to the interviews.

482 **Informed Consent Statement:** Informed consent was obtained from all subjects involved in the study.

483 **Data Availability Statement:** The data presented in this study are available on request from the  
484 corresponding author. The data are not publicly available due to privacy concerns.

485 **Conflicts of Interest:** The authors declare no conflict of interest.

486 **References**

- 487 1. Razzaghi H, Meghani M, Pingali C, Crane B, Naleway A, Weintraub E, et al. COVID-19  
488 Vaccination Coverage Among Pregnant Women During Pregnancy - Eight Integrated Health Care  
489 Organizations, United States, December 14, 2020-May 8, 2021. *Mmwr-Morbidity and Mortality Weekly*  
490 *Report*. 2021;70(24):895-9.
- 491 2. Goncu Ayhan S, Oluklu D, Atalay A, Menekse Beser D, Tanacan A, Moraloglu Tekin O, et al.  
492 COVID-19 vaccine acceptance in pregnant women. *International Journal of Gynecology & Obstetrics*.  
493 2021;154(2):291-6.
- 494 3. Regan AK, Kaur R, Nosek M, Swathi PA, Gu NY. COVID-19 vaccine acceptance and coverage  
495 among pregnant persons in the United States. *Preventive Medicine Reports*. 2022;29:101977.
- 496 4. Morgan JA, Biggio JR, Martin JK, Mussarat N, Chawla HK, Puri P, et al. Research Letter  
497 Maternal Outcomes After Severe Acute Respiratory Syndrome Coronavirus 2 (SARS-CoV-2) Infection in  
498 Vaccinated Compared With Unvaccinated Pregnant Patients. *Obstetrics and Gynecology*.  
499 2022;139(1):107-9.
- 500 5. Chervenak FA, McCullough LB, Bornstein E, Johnson L, Katz A, McLeod-Sordjan R, et al.  
501 Professionally responsible coronavirus disease 2019 vaccination counseling of obstetrical and  
502 gynecologic patients. *Am J Obstet Gynecol*. 2021;224(5):470-8.
- 503 6. Grunebaum A, McCullough LB, Litvak A, Chervenak FA. Inclusion of pregnant individuals  
504 among priority populations for coronavirus disease 2019 vaccination for all 50 states in the United States.  
505 *American Journal of Obstetrics and Gynecology*. 2021;224(5):536-9.
- 506 7. Januszek SM, Faryniak-Zuzak A, Barnas E, Lozinski T, Gora T, Siwiec N, et al. The Approach of  
507 Pregnant Women to Vaccination Based on a COVID-19 Systematic Review. *Medicina-Lithuania*.  
508 2021;57(9).
- 509 8. Badell ML, Dude CM, Rasmussen SA, Jamieson DJ. Covid-19 vaccination in pregnancy. *Bmj-*  
510 *Brit Med J*. 2022;378.
- 511 9. Male V. Are COVID-19 vaccines safe in pregnancy? *Nat Rev Immunol*. 2021;21(4):200-1.

- 512 10. Blakeway H, Prasad S, Kalafat E, Heath PT, Ladhani SN, Le Doare K, et al. COVID-19  
513 vaccination during pregnancy: coverage and safety. *Am J Obstet Gynecol.* 2022;226(2):236 e1- e14.
- 514 11. Zhang R, Qiao S, McKeever BW, Olatosi B, Li XM. Listening to Voices from African American  
515 Communities in the Southern States about COVID-19 Vaccine Information and Communication: A  
516 Qualitative Study. *Vaccines-Basel.* 2022;10(7).
- 517 12. Mheidly N, Fares J. Leveraging media and health communication strategies to overcome the  
518 COVID-19 infodemic. *J Public Health Policy.* 2020;41(4):410-20.
- 519 13. Rosenthal L, Lobel M. Explaining racial disparities in adverse birth outcomes: unique sources of  
520 stress for Black American women. *Soc Sci Med.* 2011;72(6):977-83.
- 521 14. Ogunwole SM, Oguntade HA, Bower KM, Cooper LA, Bennett WL. Health Experiences of  
522 African American Mothers, Wellness in the Postpartum Period and Beyond (HEAL): A Qualitative Study  
523 Applying a Critical Race Feminist Theoretical Framework. *International Journal of Environmental  
524 Research and Public Health.* 2023;20(13):6283.
- 525 15. Conteh N, Gagliardi J, McGahee S, Molina R, Clark CT, Clare CA. Medical Mistrust in Perinatal  
526 Mental Health. *Harv Rev Psychiatry.* 2022;30(4):238-47.
- 527 16. Shavers VL, Fagan P, Jones D, Klein WM, Boyington J, Moten C, et al. The state of research on  
528 racial/ethnic discrimination in the receipt of health care. *Am J Public Health.* 2012;102(5):953-66.
- 529 17. Braun V, Clarke V. Using thematic analysis in psychology. *Qualitative research in psychology.*  
530 2006;3(2):77-101.
- 531 18. Collins J, Alona I, Tooher R, Marshall H. Increased awareness and health care provider  
532 endorsement is required to encourage pregnant women to be vaccinated. *Human Vaccines &  
533 Immunotherapeutics.* 2014;10(10):2922-9.
- 534 19. Sharma O, Sultan AA, Ding H, Triggler CR. A Review of the Progress and Challenges of  
535 Developing a Vaccine for COVID-19. *Front Immunol.* 2020;11:585354.
- 536 20. Rambhia KJ, Watson M, Sell TK, Waldhorn R, Toner E. Mass vaccination for the 2009 H1N1  
537 pandemic: approaches, challenges, and recommendations. *Biosecur Bioterror.* 2010;8(4):321-30.



- 538 21. Njoku A, Joseph M, Felix R. Changing the Narrative: Structural Barriers and Racial and Ethnic  
539 Inequities in COVID-19 Vaccination. *International Journal of Environmental Research and Public Health*.  
540 2021;18(18):9904.
- 541 22. Colon-Lopez V, Medina-Laabes DT, Abreu RS, Diaz Miranda OL, Ortiz AP, Fernandez ME, et  
542 al. Understanding parents' views toward the newly enacted HPV vaccine school entry policy in Puerto  
543 Rico: a qualitative study. *BMC Public Health*. 2021;21(1):1938.
- 544 23. Hodgkinson EL, Smith DM, Wittkowski A. Women's experiences of their pregnancy and  
545 postpartum body image: a systematic review and meta-synthesis. *BMC pregnancy and childbirth*.  
546 2014;14(1):1-11.
- 547 24. Cai C, Busch S, Wang R, Sivak A, Davenport MH. Physical activity before and during pregnancy  
548 and maternal mental health: A systematic review and meta-analysis of observational studies. *Journal of*  
549 *Affective Disorders*. 2022.
- 550 25. Meaney S, Leitao S, Olander EK, Pope J, Matvienko-Sikar K. The impact of COVID-19 on  
551 pregnant womens' experiences and perceptions of antenatal maternity care, social support, and stress-  
552 reduction strategies. *Women and Birth*. 2022;35(3):307-16.
- 553 26. Wastnedge EA, Reynolds RM, Van Boeckel SR, Stock SJ, Denison FC, Maybin JA, et al.  
554 Pregnancy and COVID-19. *Physiological reviews*. 2021;101(1):303-18.
- 555 27. AuYoung M, Rodriguez Espinosa P, Chen WT, Juturu P, Young MT, Casillas A, et al.  
556 Addressing racial/ethnic inequities in vaccine hesitancy and uptake: lessons learned from the California  
557 alliance against COVID-19. *J Behav Med*. 2023;46(1-2):153-66.
- 558 28. ACOG. Committee Opinion: No. 563: Ethical Issues in Pandemic Influenza Planning Concerning  
559 Pregnant Women. *Obstetrics & Gynecology*. 2013;121(5):1138-43.
- 560
